# Supplementary material for: Phase transitions of multivalent proteins can promote clustering of membrane receptors
Source: eLife journal article supplement (doi:10.7554/elife.04123), 2014-10-16
Supplement: supp [file elife_poa_e04123_Figure_4_Figure_Supplement_1.pdf › elife_poa_e04123_Figure_4_Figure_Supplement_1.pdf]

a.

10  $\mu\text{M}$  NCK  
5  $\mu\text{M}$  N-WASP  
Nephrin1pY  
 $\sim 2300$  molecules/ $\mu\text{m}^2$

5  $\mu\text{M}$  NCK  
2  $\mu\text{M}$  N-WASP  
Nephrin2pY  
 $\sim 1450$  molecules/ $\mu\text{m}^2$

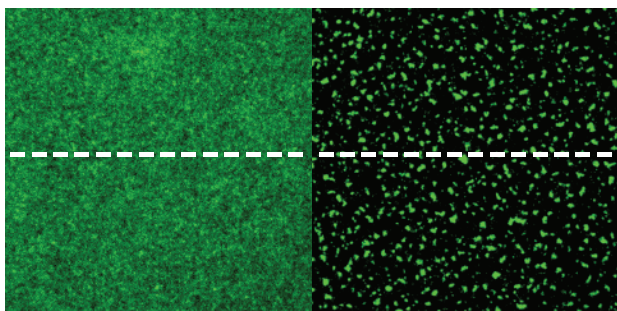

b.

5  $\mu\text{M}$  (SH3)<sub>1</sub>  
5  $\mu\text{M}$  N-WASP  
p-Nephrin  
 $\sim 1110$  molecules/ $\mu\text{m}^2$

2.5  $\mu\text{M}$  (SH3)<sub>2</sub>  
(5  $\mu\text{M}$  SH3 module conc.)  
5  $\mu\text{M}$  N-WASP  
p-Nephrin  
 $\sim 1000$  molecules/ $\mu\text{m}^2$

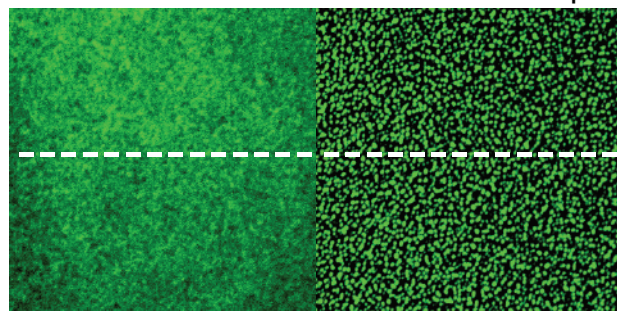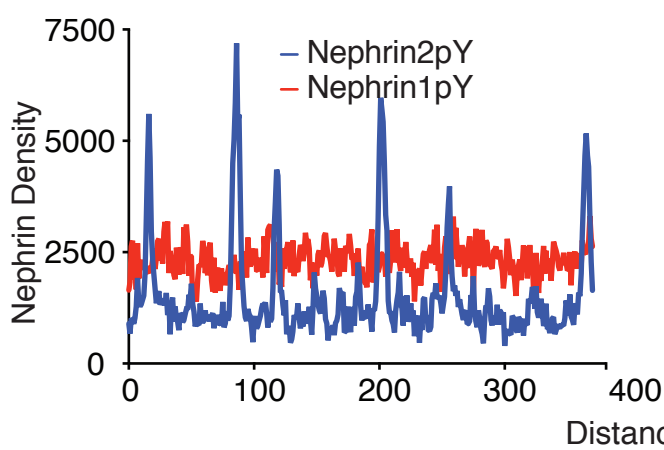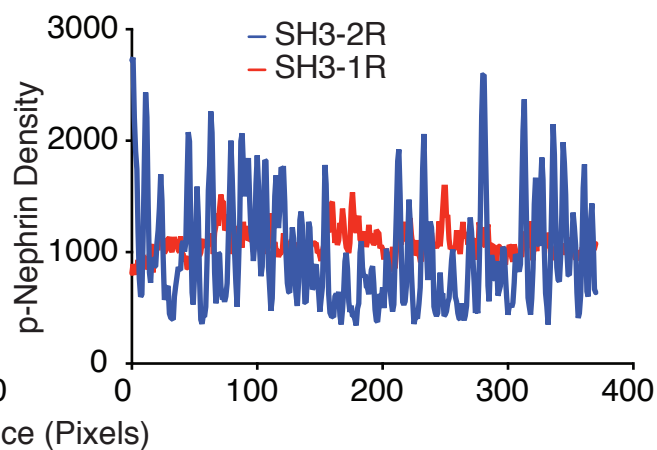

**Figure 4 - Figure Supp. 1**
