# Supplementary material for: Phase transitions of multivalent proteins can promote clustering of membrane receptors
Source: eLife journal article supplement (doi:10.7554/elife.04123), 2014-10-16
Supplement: supp [file elife_poa_e04123_Figure_5_Figure_Supplement_1.pdf › elife_poa_e04123_Figure_5_Figure_Supplement_1.pdf]

a.

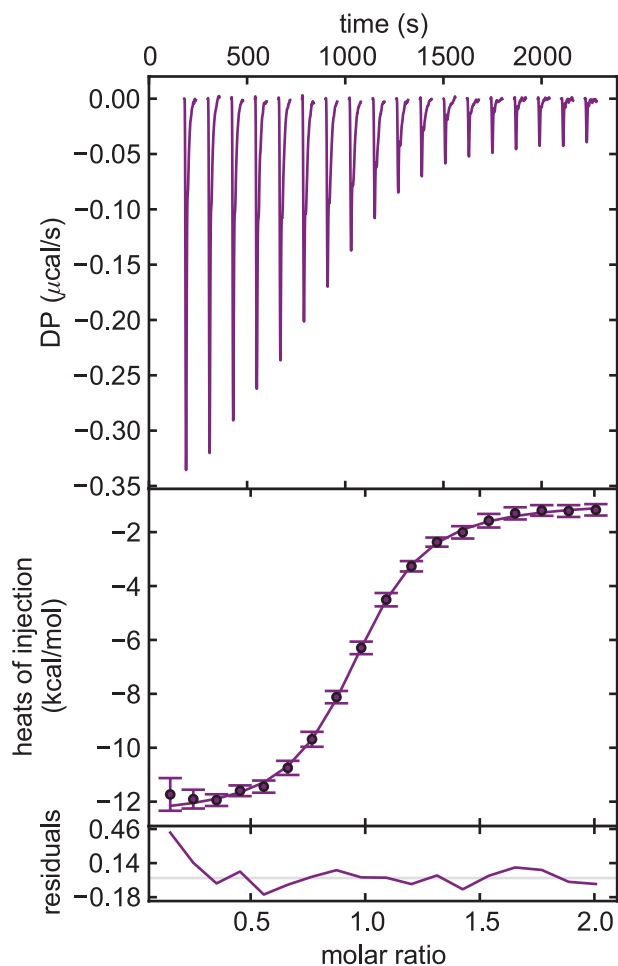

$K_D = 0.37624 \mu\text{M}$   
 $\Delta H = -11.68 \text{ kcal/mol}$   
 Incompetent Fraction p-Nephrin = 0.063  
 Incompetent Fraction NCK = 0

b.

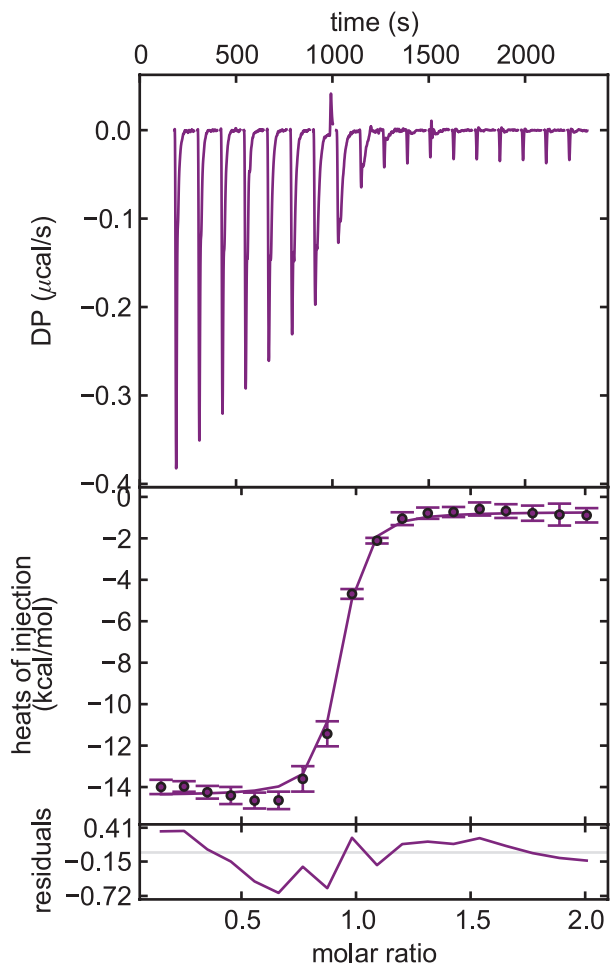

$K_D = 0.03959 \mu\text{M}$   
 $\Delta H = -13.67 \text{ kcal/mol}$   
 Incompetent Fraction p-TIR = 0.115  
 Incompetent Fraction NCK = 0

**Figure 5 - Figure Supp. 1**
