# Supplementary figures and images for: Phase transitions of multivalent proteins can promote clustering of membrane receptors
Source: eLife journal article supplement (doi:10.7554/elife.04123), 2014-10-16

a.

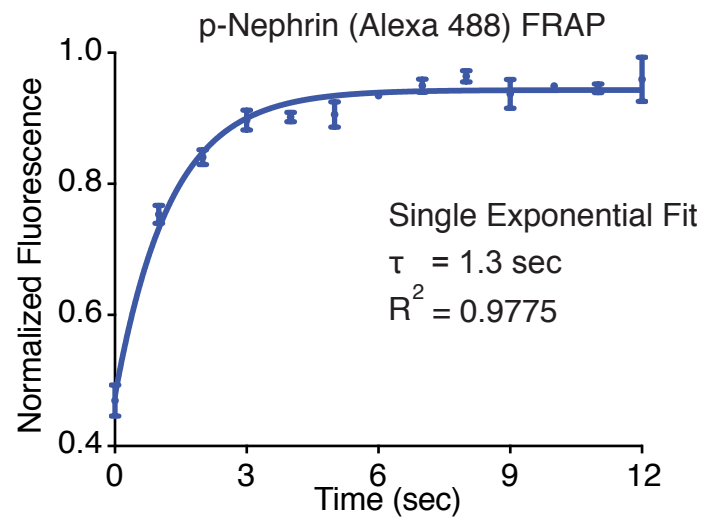

b.

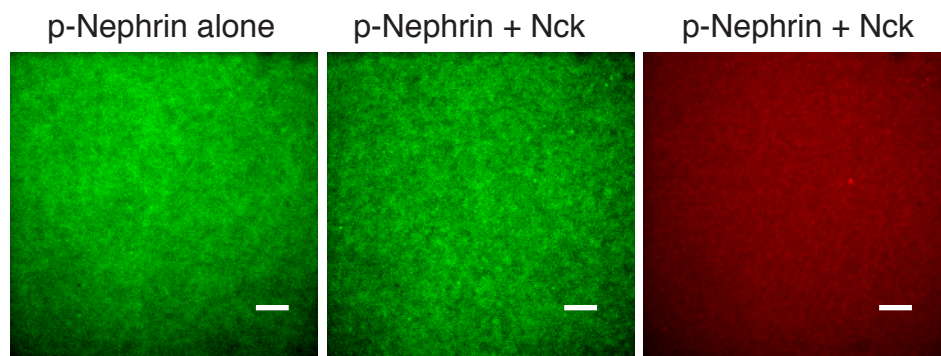

Fluorophore:      p-Nephrin-Alexa488      p-Nephrin-Alexa488      Nck-Alexa568

c.

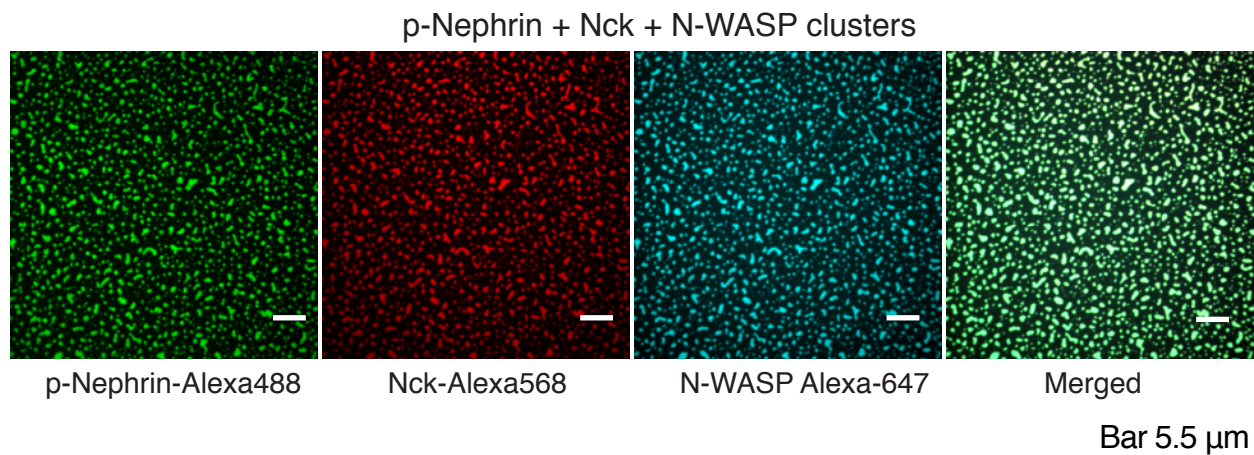

**Figure 1 - Fig. Supp. 1**

Supplement: supp [file elife_poa_e04123_Figure_1_Figure_Supplement_1.pdf › elife_poa_e04123_Figure_1_Figure_Supplement_1.pdf]

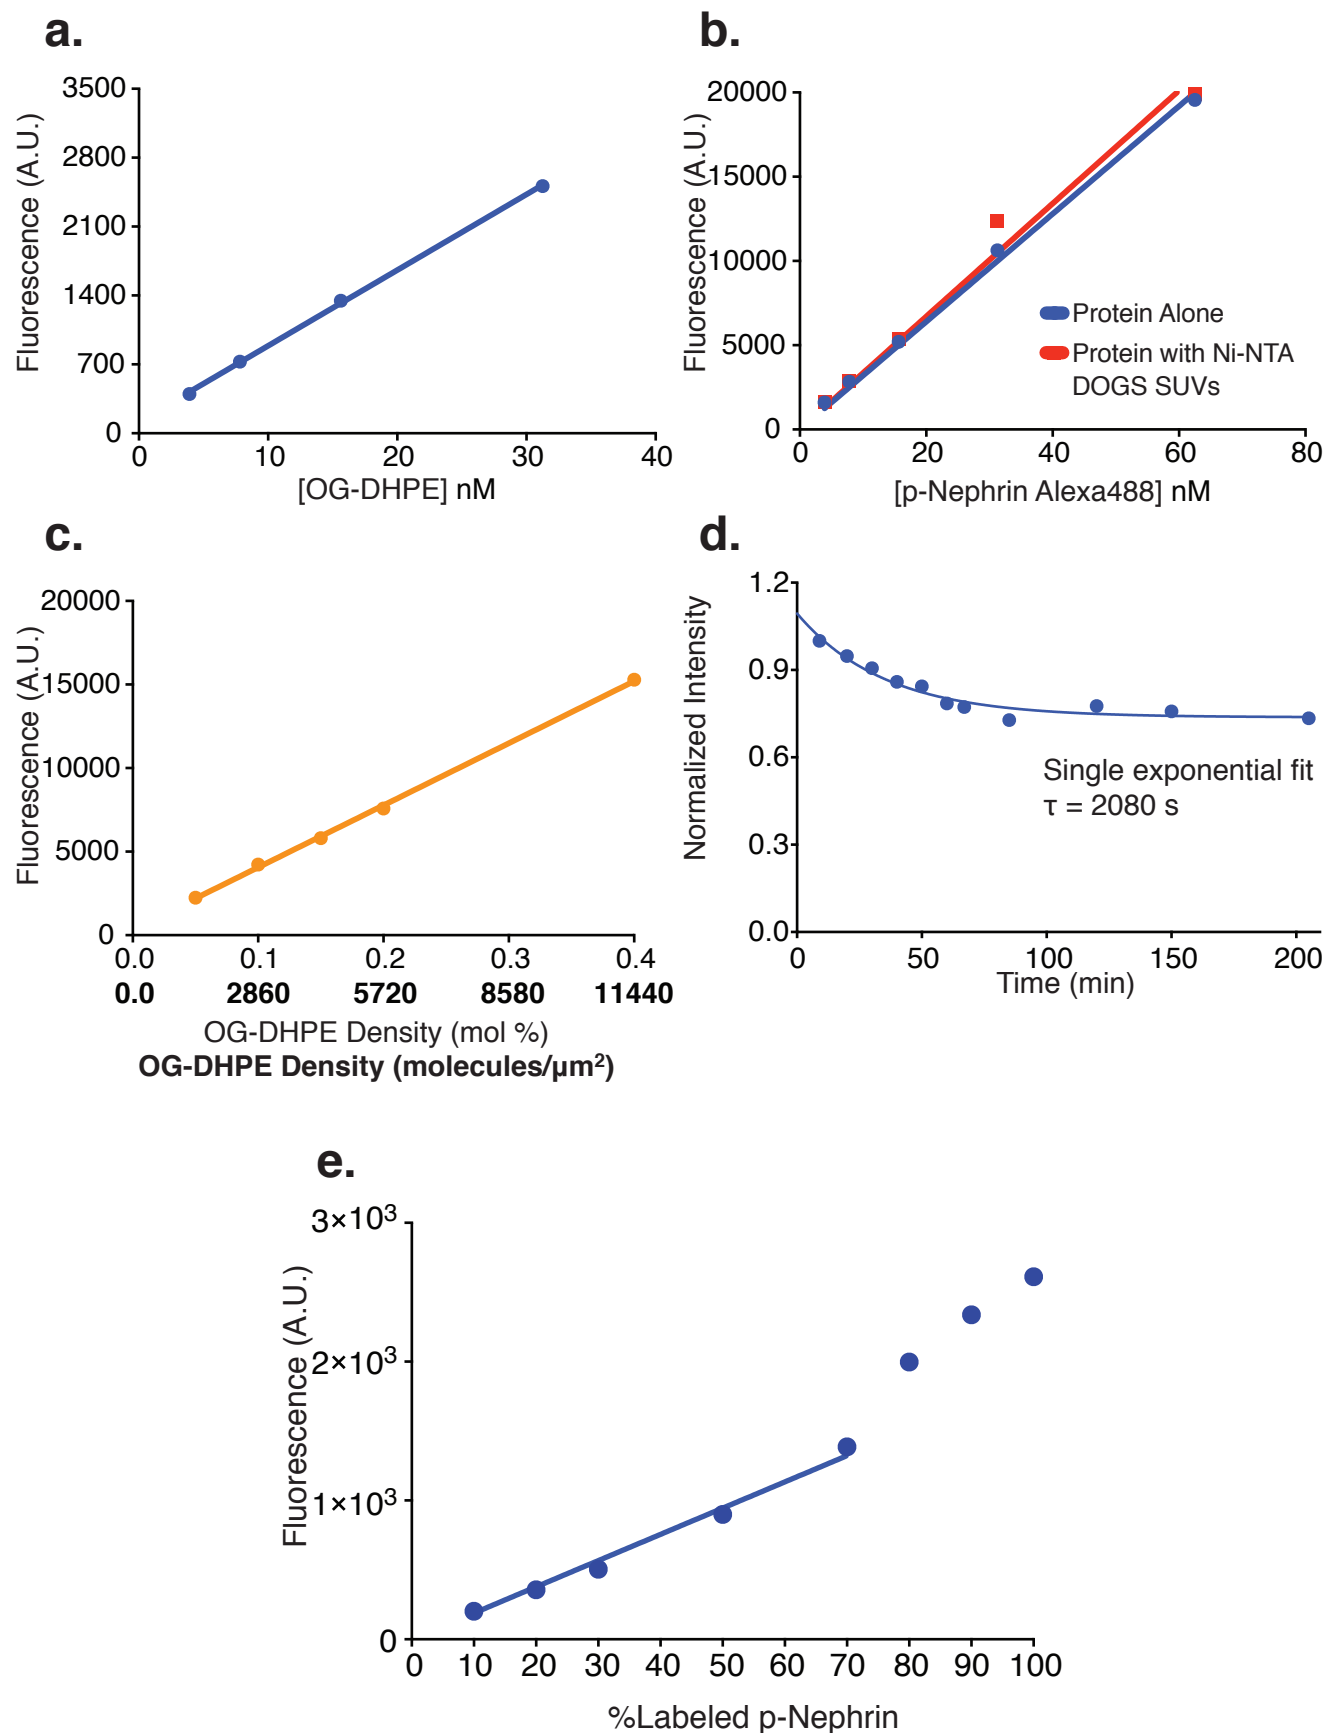

**Figure 2 - Figure Supp. 1**

Supplement: supp [file elife_poa_e04123_Figure_2_Figure_Supplement_1.pdf › elife_poa_e04123_Figure_2_Figure_Supplement_1.pdf]

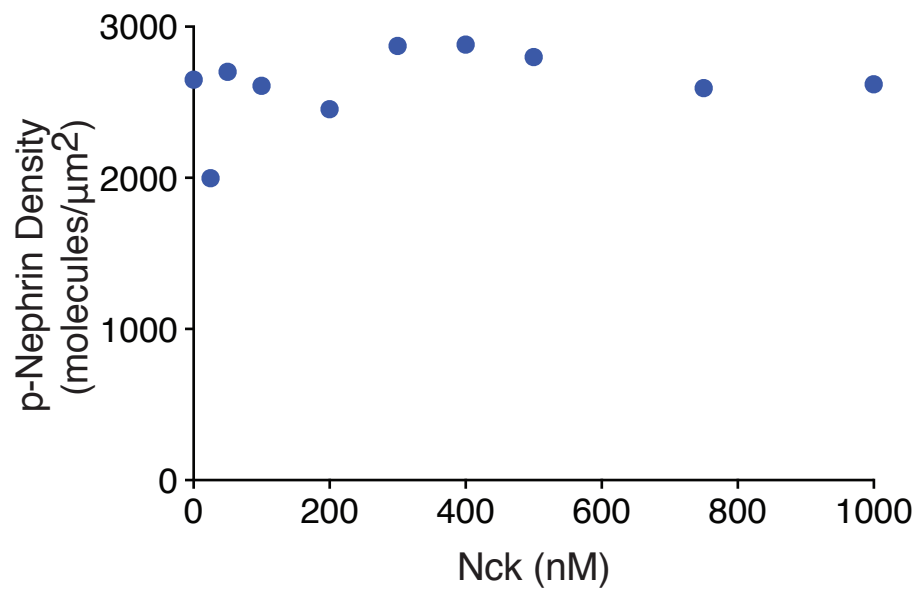

**Figure 2 - Figure Supp. 2**

Supplement: supp [file elife_poa_e04123_Figure_2_Figure_Supplement_2.pdf › elife_poa_e04123_Figure_2_Figure_Supplement_2.pdf]

Density = 2500 /  $\mu\text{m}^2$

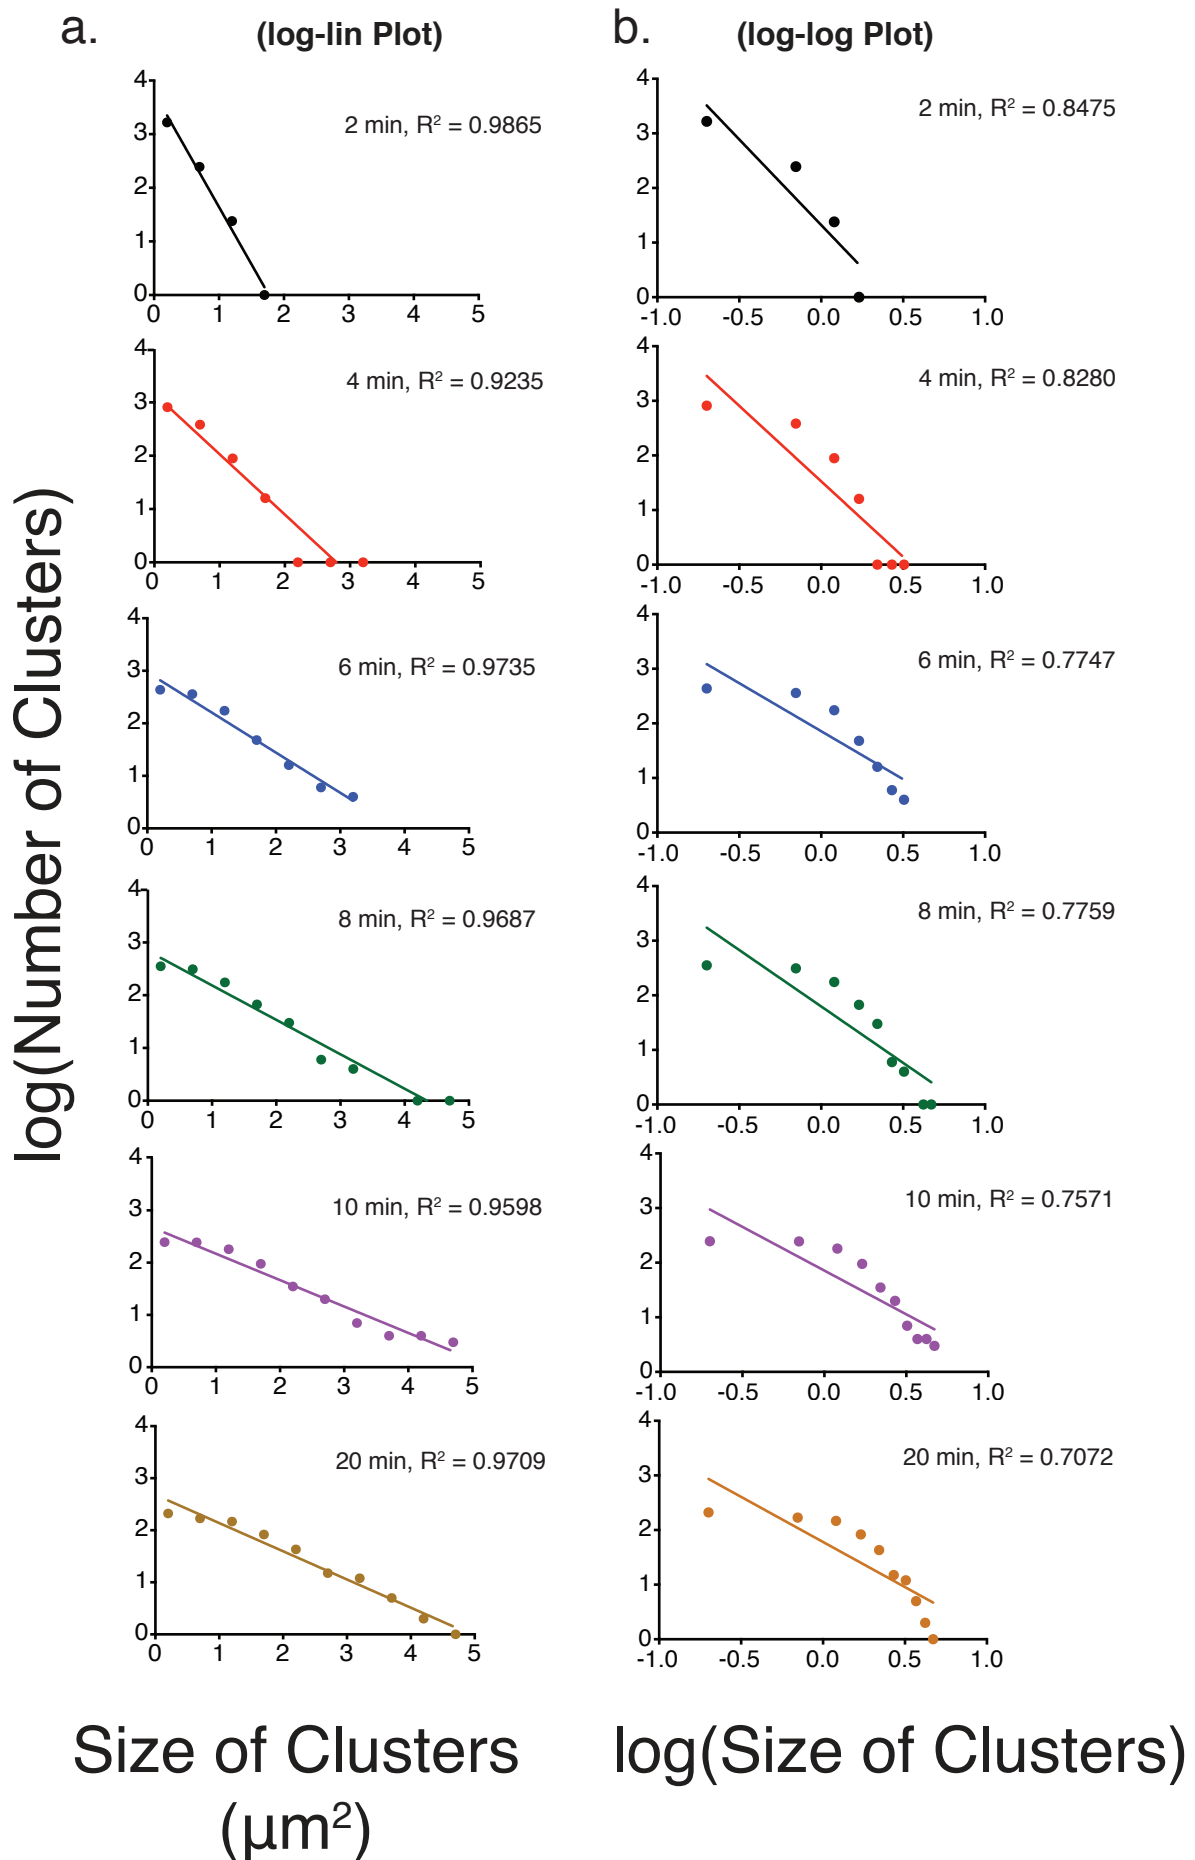

**Figure 3 - Fig. Supp. 1**

Supplement: supp [file elife_poa_e04123_Figure_3_Figure_Supplement_1.pdf › elife_poa_e04123_Figure_3_Figure_Supplement_1.pdf]

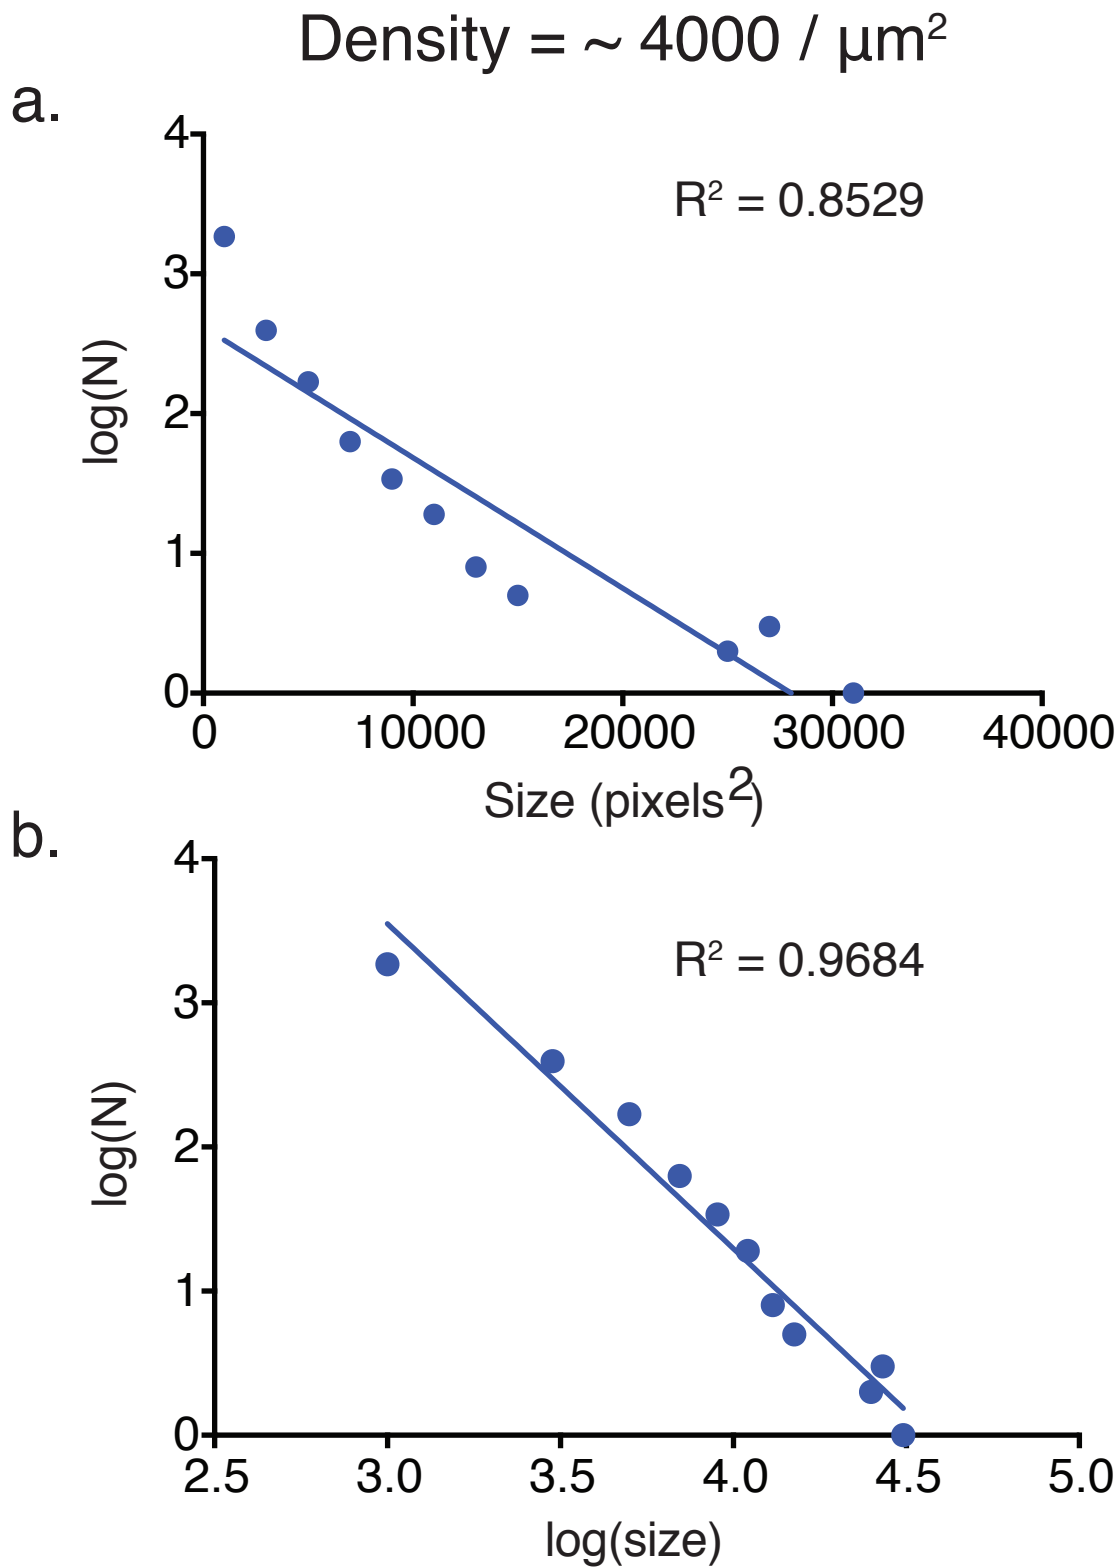

**Figure 3 - Fig. Supp. 2**

Supplement: supp [file elife_poa_e04123_Figure_3_Figure_Supplement_2.pdf › elife_poa_e04123_Figure_3_Figure_Supplement_2.pdf]

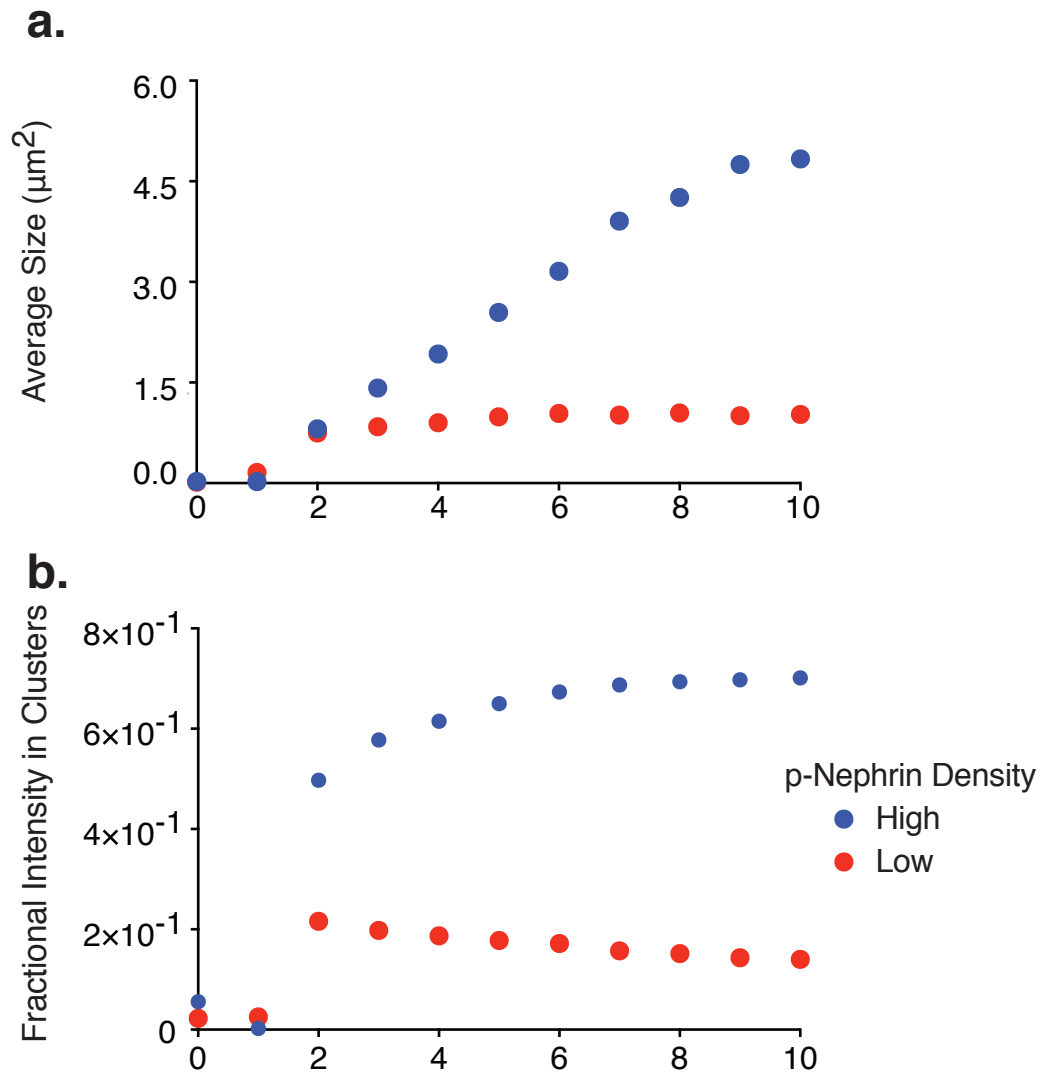

**Figure 3 - Fig. Supp. 3**

Supplement: supp [file elife_poa_e04123_Figure_3_Figure_Supplement_3.pdf › elife_poa_e04123_Figure_3_Figure_Supplement_3.pdf]

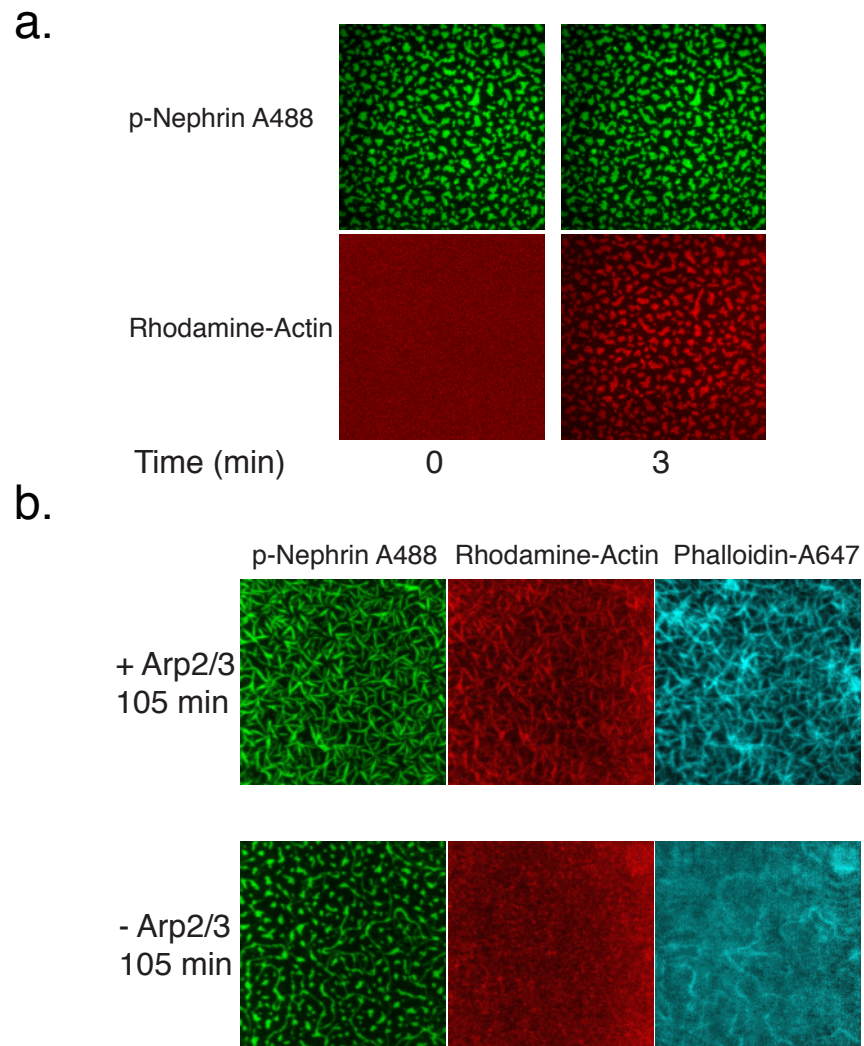

**Figure 7 - Figure Supp. 1**

Supplement: supp [file elife_poa_e04123_Figure_7_Figure_Supplement_1.pdf › elife_poa_e04123_Figure_7_Figure_Supplement_1.pdf]

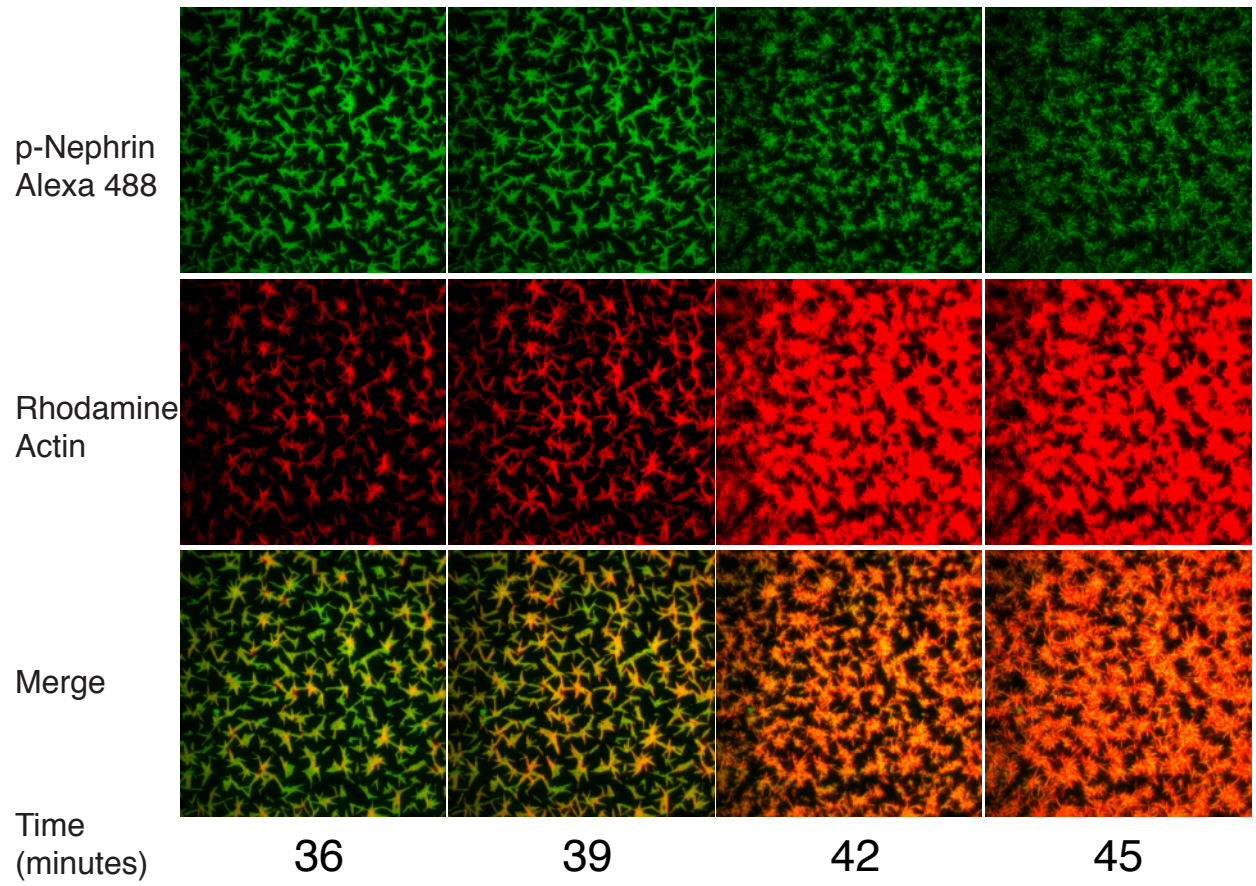

**Figure 7 - Figure Supp. 2**

Supplement: supp [file elife_poa_e04123_Figure_7_Figure_Supplement_2.pdf › elife_poa_e04123_Figure_7_Figure_Supplement_2.pdf]
